# Supplementary material
Source: PubMed Central journal article supplement (PMC3946539)
Supplement: NIHMS522411-supplement-1_si_001.pdf [file NIHMS522411-supplement-1_si_001.pdf]

## Supporting Information

### **$\pi$ vs $\sigma$ -Radical States of One-Electron Oxidized DNA/RNA Bases: A Density Functional Theory Study**

Anil Kumar and Michael D. Sevilla  
Department of Chemistry, Oakland University, Rochester, MI 48309

**Table S1-** B3LYP/6-31++G\*\* calculated hyperfine coupling constants (HFCCs) of all the radicals considered in the present study and their comparison with the available experimental values. The couplings are given for those atoms which have maximum spin density and thus only the large couplings which are experimentally observed are reported. **For all molecules the z-axis points perpendicular to the molecular ring plane.** The couplings are given in Gauss.

| $\pi$ -radical                                                                                                                      |                  |                                                       |                  |                | $\sigma$ -radical                                                                                   |                  |                                                       |                |                  |                                                                                                     |                  |                                                       |                  |               |
|-------------------------------------------------------------------------------------------------------------------------------------|------------------|-------------------------------------------------------|------------------|----------------|-----------------------------------------------------------------------------------------------------|------------------|-------------------------------------------------------|----------------|------------------|-----------------------------------------------------------------------------------------------------|------------------|-------------------------------------------------------|------------------|---------------|
| Succinimidyl <sup>•</sup> (C <sub>2v</sub> )<br>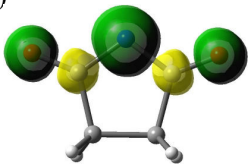   |                  |                                                       |                  |                | $\sigma$ (N)<br>  |                  |                                                       |                |                  | $\sigma$ (O)<br> |                  |                                                       |                  |               |
| Atom                                                                                                                                | A <sub>iso</sub> | A <sub>aniso</sub> (A <sub>total</sub> ) <sup>a</sup> |                  |                | Atom                                                                                                | A <sub>iso</sub> | A <sub>aniso</sub> (A <sub>total</sub> ) <sup>a</sup> |                |                  | Atom                                                                                                | A <sub>iso</sub> | A <sub>aniso</sub> (A <sub>total</sub> ) <sup>a</sup> |                  |               |
|                                                                                                                                     |                  | xx                                                    | yy               | zz             |                                                                                                     |                  | xx                                                    | yy             | zz               |                                                                                                     |                  | xx                                                    | yy               | zz            |
| N                                                                                                                                   | 9.6              | -9.5<br>(0.1)                                         | -9.2<br>(0.4)    | 18.7<br>(28.3) | N                                                                                                   | 18.8             | -10.0<br>(8.8)                                        | 21.4<br>(40.2) | -11.4<br>(7.4)   | <sup>17</sup> O                                                                                     | -12.8            | 19.3<br>(6.5)                                         | -41.2<br>(-54.0) | 21.8<br>(9.0) |
| <b>Exp.<sup>10</sup></b>                                                                                                            |                  |                                                       |                  | <b>(31)</b>    |                                                                                                     |                  |                                                       |                |                  |                                                                                                     |                  |                                                       |                  |               |
| 2-thio-T(N3-H) <sup>•</sup> (C <sub>s</sub> )<br> |                  |                                                       |                  |                | $\sigma$ (S)<br> |                  |                                                       |                |                  | Left blank                                                                                          |                  |                                                       |                  |               |
| Atom                                                                                                                                | A <sub>iso</sub> | A <sub>aniso</sub> (A <sub>total</sub> ) <sup>a</sup> |                  |                | Atom                                                                                                | A <sub>iso</sub> | A <sub>aniso</sub> (A <sub>total</sub> ) <sup>a</sup> |                |                  |                                                                                                     |                  |                                                       |                  |               |
|                                                                                                                                     |                  | xx                                                    | yy               | zz             |                                                                                                     |                  | xx                                                    | yy             | zz               |                                                                                                     |                  |                                                       |                  |               |
| <sup>33</sup> S                                                                                                                     | 6.6              | -25.7<br>(-19.1)                                      | -25.9<br>(-19.3) | 51.5<br>(58.1) | <sup>33</sup> S                                                                                     | 8.5              | -26.7<br>(-18.2)                                      | 52.2<br>(60.7) | -25.5<br>(-17.0) |                                                                                                     |                  |                                                       |                  |               |
| N3                                                                                                                                  | 1.9              | -2.0<br>(-0.1)                                        | -2.1<br>(-0.2)   | 4.1<br>(6.0)   | N3                                                                                                  | 15.4             | -2.0<br>(13.4)                                        | 3.8<br>(19.2)  | -1.8<br>(13.6)   |                                                                                                     |                  |                                                       |                  |               |
|                                                                                                                                     |                  |                                                       |                  |                | <b>Exp<sup>36</sup> (<sup>14</sup>N)</b>                                                            |                  | <b>(46.6)</b>                                         | <b>(55.5)</b>  | <b>(45.2)</b>    |                                                                                                     |                  |                                                       |                  |               |



| $\pi$ -radical                                                                                                                |                   |                                                       |                                 |                                  | $\sigma$ -radical                                                                                      |                  |                                                       |                   |                 |                                                                                                      |                  |                                                       |                 |                 |
|-------------------------------------------------------------------------------------------------------------------------------|-------------------|-------------------------------------------------------|---------------------------------|----------------------------------|--------------------------------------------------------------------------------------------------------|------------------|-------------------------------------------------------|-------------------|-----------------|------------------------------------------------------------------------------------------------------|------------------|-------------------------------------------------------|-----------------|-----------------|
| T(N3-H) <sup>•</sup> (C <sub>s</sub> )<br>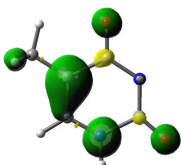   |                   |                                                       |                                 |                                  | $\pi$ (N3)<br>      |                  |                                                       |                   |                 | $\sigma$ (N3)<br> |                  |                                                       |                 |                 |
| $\pi$ (C5)                                                                                                                    |                   |                                                       |                                 |                                  | $\sigma$ (N3)                                                                                          |                  |                                                       |                   |                 |                                                                                                      |                  |                                                       |                 |                 |
| Atom                                                                                                                          | A <sub>iso</sub>  | A <sub>aniso</sub> (A <sub>total</sub> ) <sup>a</sup> |                                 |                                  | Atom                                                                                                   | A <sub>iso</sub> | A <sub>aniso</sub> (A <sub>total</sub> ) <sup>a</sup> |                   |                 | Atom                                                                                                 | A <sub>iso</sub> | A <sub>aniso</sub> (A <sub>total</sub> ) <sup>a</sup> |                 |                 |
|                                                                                                                               |                   | xx                                                    | yy                              | zz                               |                                                                                                        |                  | xx                                                    | yy                | zz              |                                                                                                      |                  | xx                                                    | yy              | zz              |
| CH <sub>3</sub> (av.) <sup>b</sup><br><b>Exp</b> <sup>20, c</sup>                                                             | 17.7<br><b>21</b> | -                                                     | -                               | -                                | N3                                                                                                     | 10.0             | -9.6<br>(0.4)                                         | -9.4<br>(0.6)     | 19.1<br>(29.1)  | N3                                                                                                   | 22.9             | 21.9<br>(44.8)                                        | -11.7<br>(11.2) | -10.2<br>(12.7) |
| N1<br><b>Exp</b> <sup>20, c</sup>                                                                                             | 6.6<br><b>5.0</b> | -5.2<br>(1.4)<br><b>(1)</b>                           | -5.1<br>(1.5)<br><b>(1)</b>     | 10.3<br>(16.9)<br><b>(13.2)</b>  |                                                                                                        |                  |                                                       |                   |                 |                                                                                                      |                  |                                                       |                 |                 |
| $\pi$ -radical                                                                                                                |                   |                                                       |                                 |                                  | $\sigma$ -radical                                                                                      |                  |                                                       |                   |                 |                                                                                                      |                  |                                                       |                 |                 |
| C <sup>+</sup> (C <sub>s</sub> )<br>         |                   |                                                       |                                 |                                  | $\sigma$ (O2)<br>    |                  |                                                       |                   |                 | $\sigma$ (N3)<br> |                  |                                                       |                 |                 |
| Atom                                                                                                                          | A <sub>iso</sub>  | A <sub>aniso</sub> (A <sub>total</sub> ) <sup>a</sup> |                                 |                                  | Atom                                                                                                   | A <sub>iso</sub> | A <sub>aniso</sub> (A <sub>total</sub> ) <sup>a</sup> |                   |                 | Atom                                                                                                 | A <sub>iso</sub> | A <sub>aniso</sub> (A <sub>total</sub> ) <sup>a</sup> |                 |                 |
|                                                                                                                               |                   | xx                                                    | yy                              | zz                               |                                                                                                        |                  | xx                                                    | yy                | zz              |                                                                                                      |                  | xx                                                    | yy              | zz              |
| H5<br><b>Exp</b> <sup>10, d</sup>                                                                                             | -8.2              | 5.0<br>(-3.2)<br><b>(-5)</b>                          | -4.5<br>(-12.7)<br><b>(-16)</b> | -0.5<br>(-8.7)<br><b>(-13.5)</b> | <sup>17</sup> O2                                                                                       | -26.7            | 47.2<br>(20.5)                                        | -91.7<br>(-118.4) | 44.5<br>(17.8)  | N3                                                                                                   | 30.7             | -13.1<br>(17.6)                                       | 24.2<br>(54.9)  | -11.2<br>(19.5) |
| C(N4-H) <sup>•</sup> (C <sub>s</sub> )<br> |                   |                                                       |                                 |                                  | $\sigma$ (N3)<br> |                  |                                                       |                   |                 | Left blank                                                                                           |                  |                                                       |                 |                 |
| $\pi$ (N4)                                                                                                                    |                   |                                                       |                                 |                                  | $\sigma$ (N3)                                                                                          |                  |                                                       |                   |                 |                                                                                                      |                  |                                                       |                 |                 |
| Atom                                                                                                                          | A <sub>iso</sub>  | A <sub>aniso</sub>                                    |                                 |                                  | Atom                                                                                                   | A <sub>iso</sub> | A <sub>aniso</sub> (A <sub>total</sub> ) <sup>a</sup> |                   |                 |                                                                                                      |                  |                                                       |                 |                 |
|                                                                                                                               |                   | xx                                                    | yy                              | zz                               |                                                                                                        |                  | xx                                                    | yy                | zz              |                                                                                                      |                  |                                                       |                 |                 |
| N4                                                                                                                            | 10.4              | -10.4<br>(0)                                          | -10.7<br>(-0.3)                 | 21.1<br>(31.5)                   | N3                                                                                                     | 29.0             | -12.2<br>(16.8)                                       | 22.7<br>(51.7)    | -10.5<br>(18.5) |                                                                                                      |                  |                                                       |                 |                 |

| $\pi$ -radical                                                                                                                            |                  |                                                       |                 |                 | $\sigma$ -radical                                                                                    |                  |                                                       |                 |                 |
|-------------------------------------------------------------------------------------------------------------------------------------------|------------------|-------------------------------------------------------|-----------------|-----------------|------------------------------------------------------------------------------------------------------|------------------|-------------------------------------------------------|-----------------|-----------------|
| C(N4-H <sup>+</sup> ) <sup>•</sup> (C <sub>s</sub> )<br>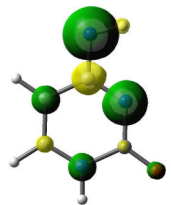 |                  |                                                       |                 |                 | $\sigma$ (N4)<br> |                  |                                                       |                 |                 |
| Atom                                                                                                                                      | A <sub>iso</sub> | A <sub>aniso</sub> (A <sub>total</sub> ) <sup>a</sup> |                 |                 | Atom                                                                                                 | A <sub>iso</sub> | A <sub>aniso</sub> (A <sub>total</sub> ) <sup>a</sup> |                 |                 |
|                                                                                                                                           |                  | xx                                                    | yy              | zz              |                                                                                                      |                  | xx                                                    | yy              | zz              |
| N4                                                                                                                                        | 11.0             | -10.8<br>(0.2)                                        | -10.7<br>(0.3)  | 21.5<br>(32.5)  | N4                                                                                                   | 30.4             | 22.3<br>(52.7)                                        | -12.0<br>(18.4) | -10.3<br>(20.1) |
| 6-azaU <sup>++</sup> (C <sub>s</sub> )<br>               |                  |                                                       |                 |                 |                   |                  |                                                       |                 |                 |
| Atom                                                                                                                                      | A <sub>iso</sub> | A <sub>aniso</sub> (A <sub>total</sub> ) <sup>a</sup> |                 |                 | Atom                                                                                                 | A <sub>iso</sub> | A <sub>aniso</sub> (A <sub>total</sub> ) <sup>a</sup> |                 |                 |
|                                                                                                                                           |                  | xx                                                    | yy              | zz              |                                                                                                      |                  | xx                                                    | yy              | zz              |
| H5                                                                                                                                        | -13.0            | 7.3<br>(-5.7)                                         | -6.1<br>(-19.1) | -1.2<br>(-14.2) | N6                                                                                                   | 15.7             | -5.7<br>(10.0)                                        | 10.5<br>(26.2)  | -4.8<br>(10.9)  |
| 6-azaU(N1-H) <sup>•</sup> (C <sub>s</sub> )<br>         |                  |                                                       |                 |                 | $\sigma$ (N)<br> |                  |                                                       |                 |                 |
| Atom                                                                                                                                      | A <sub>iso</sub> | A <sub>aniso</sub>                                    |                 |                 | Atom                                                                                                 | A <sub>iso</sub> | A <sub>aniso</sub> (A <sub>total</sub> ) <sup>a</sup> |                 |                 |
|                                                                                                                                           |                  | xx                                                    | yy              | zz              |                                                                                                      |                  | xx                                                    | yy              | zz              |
| N1                                                                                                                                        | 8.9              | -8.0<br>(0.9)                                         | -7.8<br>(1.1)   | 15.8<br>(24.7)  | N1                                                                                                   | 44.5             | -5.5<br>(39.0)                                        | 9.7<br>(54.2)   | -4.2<br>(40.3)  |
| H5                                                                                                                                        | -13.6            | 7.5<br>(-6.1)                                         | -6.8<br>(-20.4) | -0.7<br>(-14.3) | N6                                                                                                   | 40.5             | -7.0<br>(33.5)                                        | 12.7<br>(53.2)  | -5.7<br>(34.8)  |
|                                                                                                                                           |                  |                                                       |                 |                 | <b>Exp<sup>13</sup><br/>(N1,N6)</b>                                                                  | <b>(30.2)</b>    | <b>(26.0)</b>                                         | <b>(38.5)</b>   | <b>(26.0)</b>   |

| $\pi$ -radical                                  |                  |                                                       |               |                | $\sigma$ -radical                                                                   |                  |                                                       |                |                |
|-------------------------------------------------|------------------|-------------------------------------------------------|---------------|----------------|-------------------------------------------------------------------------------------|------------------|-------------------------------------------------------|----------------|----------------|
| 6-azaT <sup>+</sup> (C <sub>s</sub> )           |                  |                                                       |               |                | 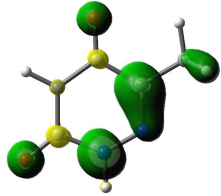   |                  |                                                       |                |                |
| Atom                                            | A <sub>iso</sub> | A <sub>aniso</sub>                                    |               |                | Atom                                                                                | A <sub>iso</sub> | A <sub>aniso</sub> (A <sub>total</sub> ) <sup>a</sup> |                |                |
|                                                 |                  | xx                                                    | yy            | zz             |                                                                                     |                  | xx                                                    | yy             | zz             |
| CH <sub>3</sub> (av.) <sup>b</sup><br>(H atoms) | 22.0             | -                                                     | -             | -              | N6                                                                                  | 20.8             | -7.0<br>(13.8)                                        | 12.5<br>(33.3) | -5.5<br>(15.3) |
| 6-azaT(N1-H) <sup>•</sup> (C <sub>s</sub> )     |                  |                                                       |               |                |  |                  |                                                       |                |                |
| Atom                                            | A <sub>iso</sub> | A <sub>aniso</sub> (A <sub>total</sub> ) <sup>a</sup> |               |                | Atom                                                                                | A <sub>iso</sub> | A <sub>aniso</sub> (A <sub>total</sub> ) <sup>a</sup> |                |                |
|                                                 |                  | xx                                                    | yy            | zz             |                                                                                     |                  | xx                                                    | yy             | zz             |
| CH <sub>3</sub> (av.)                           | 15.8             | -                                                     | -             | -              | CH <sub>3</sub> (av.) <sup>b</sup>                                                  | -1.5             | -                                                     | -              | -              |
| N1                                              | 8.2              | -7.4<br>(0.8)                                         | -7.2<br>(1.0) | 14.6<br>(22.8) | N1                                                                                  | 44.9             | -5.5<br>(39.4)                                        | 9.5<br>(54.4)  | -4.0<br>(40.9) |
| N6                                              | -2.6             | 1.4<br>(-1.2)                                         | 2.1<br>(0.5)  | -3.5<br>(-6.1) | N6                                                                                  | 40.0             | -7.2<br>(32.8)                                        | 12.9<br>(52.9) | -5.7<br>(34.3) |
| <b>Exp.<sup>13</sup> (CH<sub>3</sub>)</b>       | <b>14.7</b>      | -                                                     | -             | -              |                                                                                     |                  |                                                       |                |                |
| <b>Exp.<sup>13</sup> (N1)</b>                   | <b>8 – 10</b>    | <b>&lt; 3</b>                                         | <b>&lt; 3</b> | <b>23.0</b>    |                                                                                     |                  |                                                       |                |                |
| <b>Exp.<sup>13</sup> (N6)</b>                   | <b>&lt; 4</b>    | <b>&lt; 4</b>                                         | <b>&lt; 4</b> | <b>&lt; 4</b>  |                                                                                     |                  |                                                       |                |                |

| $\pi$ -radical                                                                                                                   |                  |                                                       |                 |                  | $\sigma$ -radical                                                                                    |                  |                                                       |                   |                |
|----------------------------------------------------------------------------------------------------------------------------------|------------------|-------------------------------------------------------|-----------------|------------------|------------------------------------------------------------------------------------------------------|------------------|-------------------------------------------------------|-------------------|----------------|
| 6-azaC <sup>++</sup> (C <sub>s</sub> )<br>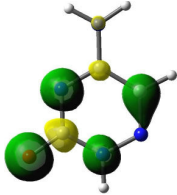      |                  |                                                       |                 |                  | $\sigma$ (O2)<br> |                  |                                                       |                   |                |
| Atom                                                                                                                             | A <sub>iso</sub> | A <sub>aniso</sub> (A <sub>total</sub> ) <sup>a</sup> |                 |                  | Atom                                                                                                 | A <sub>iso</sub> | A <sub>aniso</sub> (A <sub>total</sub> ) <sup>a</sup> |                   |                |
|                                                                                                                                  |                  | xx                                                    | yy              | zz               |                                                                                                      |                  | xx                                                    | yy                | zz             |
| <sup>17</sup> O2                                                                                                                 | -15.9            | 30.4<br>(14.5)                                        | 30.1<br>(14.2)  | -60.5<br>(-76.4) | <sup>17</sup> O2                                                                                     | -25.2            | 45.3<br>(20.1)                                        | -87.2<br>(-112.4) | 42.0<br>(16.8) |
| N3                                                                                                                               | 3.9              | -3.9<br>(0)                                           | -4.0<br>(-0.1)  | 7.9<br>(11.8)    |                                                                                                      |                  |                                                       |                   |                |
| 6-azaC(N1-H) <sup>+</sup> (C <sub>s</sub> )<br> |                  |                                                       |                 |                  | $\sigma$ (N)<br>  |                  |                                                       |                   |                |
| Atom                                                                                                                             | A <sub>iso</sub> | A <sub>aniso</sub> (A <sub>total</sub> ) <sup>a</sup> |                 |                  | Atom                                                                                                 | A <sub>iso</sub> | A <sub>aniso</sub> (A <sub>total</sub> ) <sup>a</sup> |                   |                |
|                                                                                                                                  |                  | xx                                                    | yy              | zz               |                                                                                                      |                  | xx                                                    | yy                | zz             |
| N1                                                                                                                               | 7.1              | -6.7<br>(0.4)                                         | -6.5<br>(0.6)   | 13.1<br>(20.2)   | N1                                                                                                   | 22.6             | -6.9<br>(15.7)                                        | 12.3<br>(34.9)    | -5.5<br>(17.1) |
| H5                                                                                                                               | -11.7            | 6.7<br>(-5.0)                                         | -6.3<br>(-18.0) | -0.4<br>(-12.1)  | N6                                                                                                   | 32.1             | -4.3<br>(27.8)                                        | 8.4<br>(40.5)     | -4.1<br>(28)   |
|                                                                                                                                  |                  |                                                       |                 |                  | N3                                                                                                   | -0.1             | -2.8<br>(-2.9)                                        | 5.5<br>(5.4)      | -2.7<br>(-2.8) |
|                                                                                                                                  |                  |                                                       |                 |                  | <b>Exp<sup>13</sup> (N1, N6)</b>                                                                     | <b>31</b>        | <b>27</b>                                             | <b>39</b>         | <b>27</b>      |
|                                                                                                                                  |                  |                                                       |                 |                  | <b>Exp<sup>13</sup> (N3)</b>                                                                         | <b>&lt; 5</b>    | <b>&lt; 5</b>                                         | <b>&lt; 5</b>     | <b>&lt; 5</b>  |





| $\pi$ -radical                                                                                                              |                  |                                                       |               |                | $\sigma$ -radical                                                                                   |                  |                                                       |                  |                 |                                                                                                            |                  |                                                       |               |               |
|-----------------------------------------------------------------------------------------------------------------------------|------------------|-------------------------------------------------------|---------------|----------------|-----------------------------------------------------------------------------------------------------|------------------|-------------------------------------------------------|------------------|-----------------|------------------------------------------------------------------------------------------------------------|------------------|-------------------------------------------------------|---------------|---------------|
| G(N1-H) <sup>•</sup> (C <sub>s</sub> )<br>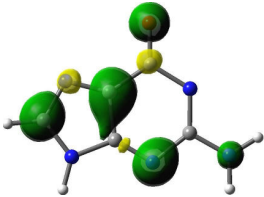 |                  |                                                       |               |                | $\sigma$ (O6)<br> |                  |                                                       |                  |                 | $\sigma$ (N)<br>PCM<br> |                  |                                                       |               |               |
| Atom                                                                                                                        | A <sub>iso</sub> | A <sub>aniso</sub> (A <sub>total</sub> ) <sup>a</sup> |               |                | Atom                                                                                                | A <sub>iso</sub> | A <sub>aniso</sub> (A <sub>total</sub> ) <sup>a</sup> |                  |                 | Atom                                                                                                       | A <sub>iso</sub> | A <sub>aniso</sub> (A <sub>total</sub> ) <sup>a</sup> |               |               |
|                                                                                                                             |                  | xx                                                    | yy            | zz             |                                                                                                     |                  | xx                                                    | yy               | zz              |                                                                                                            |                  | xx                                                    | yy            | zz            |
| N2                                                                                                                          | 0.9              | -1.0<br>(-0.1)                                        | -0.8<br>(0.1) | 1.8<br>(2.7)   | O6                                                                                                  | -26.4            | 45.0<br>(18.6)                                        | -87.2<br>(113.6) | 42.2<br>(15.8)  | N1                                                                                                         | 13.8             | 17.6<br>(31.4)                                        | -9.4<br>(4.4) | -8.2<br>(5.6) |
| N3                                                                                                                          | 5.8              | -4.8<br>(1.0)                                         | -4.8<br>(1.0) | 9.6<br>(15.4)  |                                                                                                     |                  |                                                       |                  |                 |                                                                                                            |                  |                                                       |               |               |
| <b>Exp<sup>22</sup> (N2)</b>                                                                                                |                  | <b>0</b>                                              | <b>0</b>      | <b>8</b>       |                                                                                                     |                  |                                                       |                  |                 |                                                                                                            |                  |                                                       |               |               |
| <b>(N3)</b>                                                                                                                 |                  | <b>0</b>                                              | <b>0</b>      | <b>12</b>      |                                                                                                     |                  |                                                       |                  |                 |                                                                                                            |                  |                                                       |               |               |
| G(N2-H) <sup>•</sup> (C <sub>s</sub> )<br> |                  |                                                       |               |                | $\sigma$ (N2)<br> |                  |                                                       |                  |                 |                                                                                                            |                  |                                                       |               |               |
| Atom                                                                                                                        | A <sub>iso</sub> | A <sub>aniso</sub> (A <sub>total</sub> ) <sup>a</sup> |               |                | Atom                                                                                                | A <sub>iso</sub> | A <sub>aniso</sub> (A <sub>total</sub> ) <sup>a</sup> |                  |                 |                                                                                                            |                  |                                                       |               |               |
|                                                                                                                             |                  | xx                                                    | yy            | zz             |                                                                                                     |                  | xx                                                    | yy               | zz              |                                                                                                            |                  |                                                       |               |               |
| N2                                                                                                                          | 6.0              | -5.7<br>(0.3)                                         | -5.6<br>(0.4) | 11.3<br>(17.3) | N2                                                                                                  | 35.7             | 24.0<br>(59.7)                                        | -12.7<br>(23.0)  | -11.3<br>(24.4) |                                                                                                            |                  |                                                       |               |               |
| N3                                                                                                                          | 6.3              | -5.2<br>(1.1)                                         | -5.3<br>(1.0) | 10.5<br>(16.8) |                                                                                                     |                  |                                                       |                  |                 |                                                                                                            |                  |                                                       |               |               |
| <b>Exp<sup>22</sup> (N3)</b>                                                                                                |                  | <b>(0)</b>                                            | <b>(0)</b>    | <b>(8)</b>     |                                                                                                     |                  |                                                       |                  |                 |                                                                                                            |                  |                                                       |               |               |
| <b>(N2)</b>                                                                                                                 |                  | <b>(0)</b>                                            | <b>(0)</b>    | <b>(12)</b>    |                                                                                                     |                  |                                                       |                  |                 |                                                                                                            |                  |                                                       |               |               |

<sup>a</sup>A<sub>total</sub> = (A<sub>iso</sub> + A<sub>aniso</sub>); A<sub>iso</sub> = isotropic and A<sub>aniso</sub> = anisotropic coupling.

<sup>b</sup>Methyl hydrogens couplings are the average of the three A<sub>iso</sub> couplings (assumes rapid rotation as found by experiment). The calculated A<sub>aniso</sub> couplings are very small and are not given.

<sup>c</sup>Experimental values in Ref. 20 are for thymidine.

<sup>d</sup>Experimental values for N1 deprotonated U and C.
